# Supplementary material for: The impact of primary tumor location on efficacy of cetuximab in metastatic colorectal cancer patients with different Kras status: a systematic review and meta-analysis
Source: PubMed Central journal article supplement (PMC5581136; doi:10.18632/oncotarget.19022), 2017-07-05
Supplement: oncotarget-08-53631-s001.pdf [file oncotarget-08-53631-s001.pdf]

## The impact of primary tumor location on efficacy of cetuximab in metastatic colorectal cancer patients with different Kras status: a systematic review and meta-analysis

### SUPPLEMENTARY MATERIALS

**Supplementary Table 1: Additional baseline characteristics of included studies**

| Study           | Year | stage      | Definition of OS/PFS | OS/PFS | Surgery prior to CT | CR/PR/DCR  | RCT or retrospective or observational |
|-----------------|------|------------|----------------------|--------|---------------------|------------|---------------------------------------|
| Wang Jue        | 2016 | metastatic | Yes                  | Clear  | No                  | RECIST     | Restrospective                        |
| Feng Wang       | 2015 | metastatic | Yes                  | Clear  | Partly              | RECIST 1.1 | Restrospective                        |
| von Einem JC    | 2014 | metastatic | Yes                  | Clear  | No                  | RECIST     | Restrospective                        |
| Kuo-Hsing Chen  | 2016 | metastatic | Yes                  | Clear  | No                  | NR         | Restrospective                        |
| Rui Qin         | 2014 | metastatic | Yes                  | Clear  | No                  | RECIST 1.1 | Restrospective                        |
| Moretto R       | 2016 | metastatic | Yes                  | Clear  | No                  | RECIST     | Restrospective                        |
| Alan P. Venook  | 2016 | metastatic | Yes                  | Clear  | Partly              | RECIST     | Restrospective                        |
| Eric Van Cutsem | 2016 | metastatic | Yes                  | Clear  | Partly              | RECIST     | Restrospective                        |
| Heinemann V     | 2014 | metastatic | Yes                  | Clear  | Partly              | RECIST 1.1 | Restrospective                        |
| Yu Sunakawa     | 2016 | metastatic | Yes                  | Clear  | No                  | RECIST     | Restrospective                        |

Note, data in the study of Julien Taieb was removed from meta-analysis as the obvious different stage and treatments.
